# Supplementary material for: Ab initio insight into ultrafast nonadiabatic decay of hypoxanthine: keto-N7H and keto-N9H tautomers
Source: Royal Society of Chemistry journal article supplement (doi:10.1039/c3cp44718a), 2013-01-01
Supplement: c3cp44718a.pdf [file c3cp44718a.pdf]

## Electronic Supplementary Information

### Ab initio insight into ultrafast nonadiabatic decay of hypoxanthine: keto-N7H and keto-N9H tautomers

Xugeng Guo,<sup>a</sup> Zhenggang Lan<sup>\*b</sup> and Zexing Cao<sup>\*a</sup>

<sup>a</sup> *State Key Laboratory for Physical Chemistry of Solid Surfaces and Fujian Provincial Key Lab of Theoretical and Computational Chemistry, College of Chemistry and Chemical Engineering, Xiamen University, Xiamen 361005, P.R. China. E-mail: zxcao@xmu.edu.cn*

<sup>b</sup> *Qingdao Key Laboratory of Solar Energy Utilization and Energy Storage Technology, Qingdao institute of Bioenergy and Bioprocess Technology, Chinese Academy of Sciences, Qingdao, 266101, P.R. China E-mail: lanzg@qibebt.ac.cn*

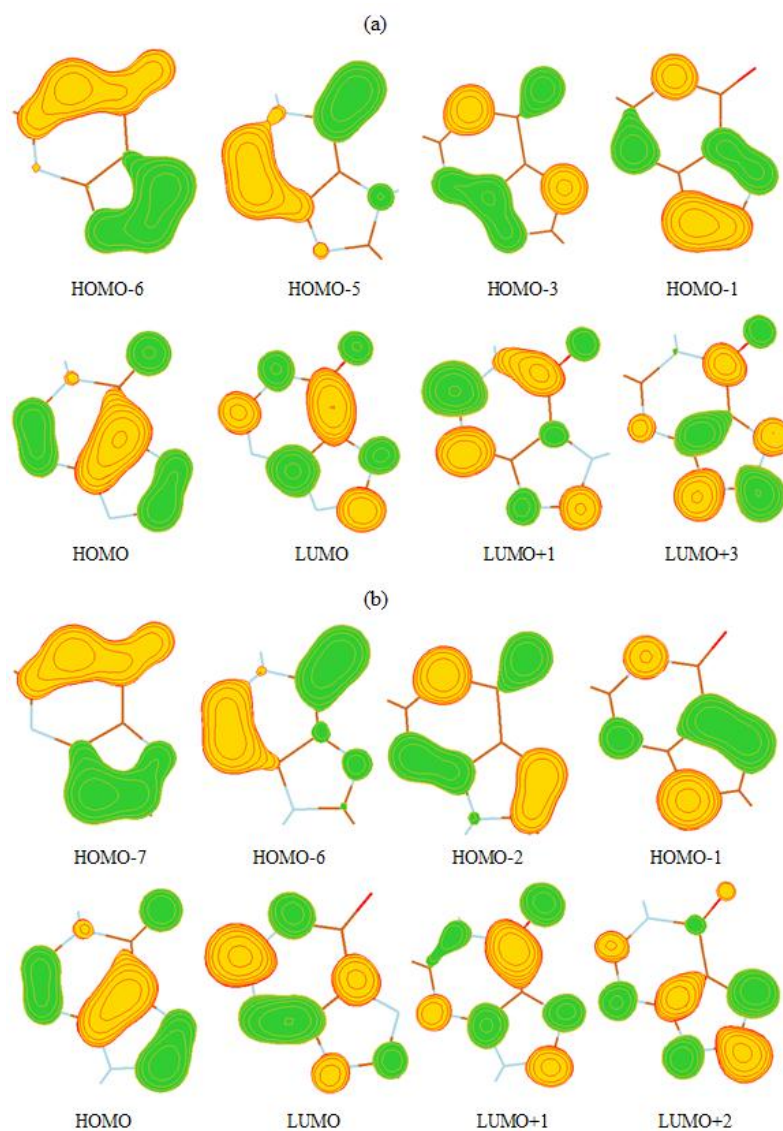

**Fig. S1.** Schematic plots of HOMO and LUMO molecular orbitals for keto-N7H (a) and keto-N9H (b) with an isosurface value of 0.05.

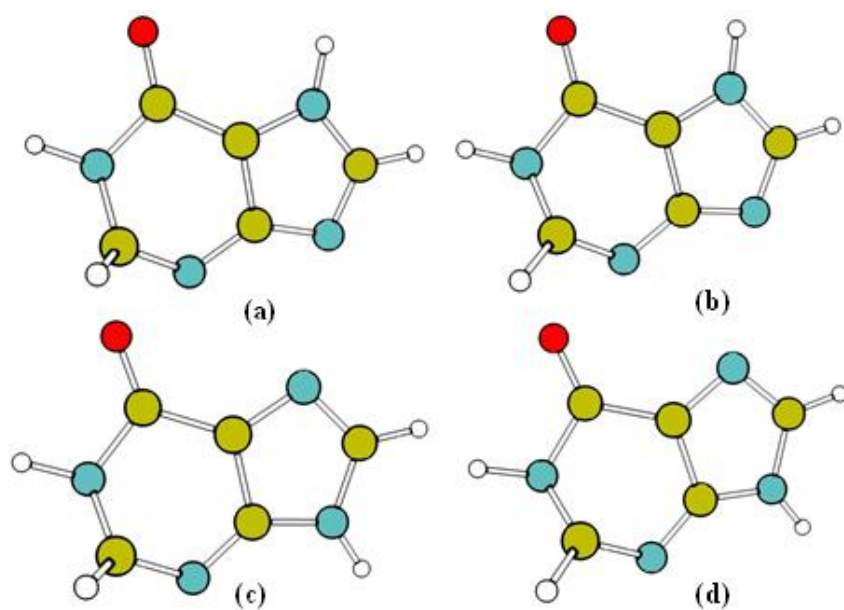

**Fig. S2.** Minima on the crossing seams (MXSs) between the  $S_1$  and  $S_0$  states of keto-N7H and keto-N9H ( ${}^2E$  conformation). (a) (c): *Ethyleneic I*; (b) (d): *Ethyleneic II*.

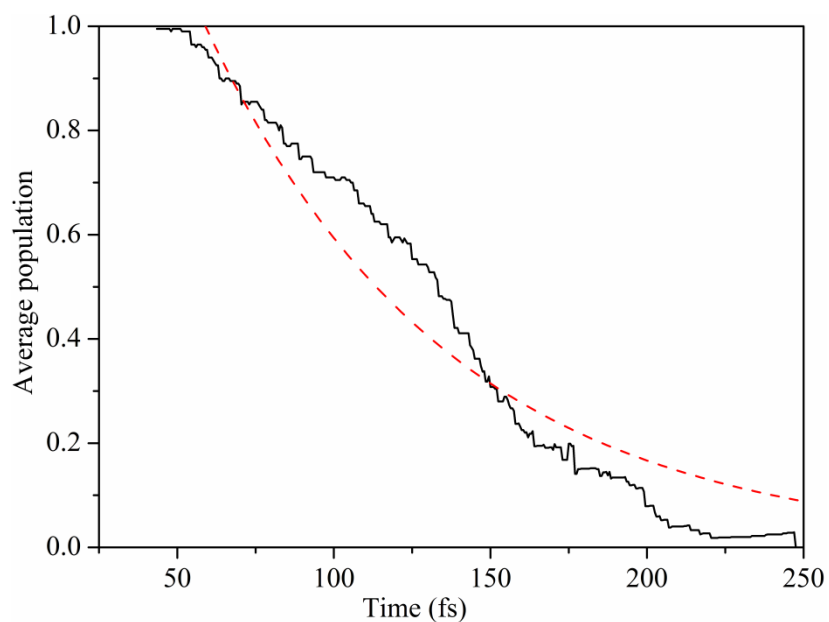

**Fig. S3.** Time evolution of the  $S_1$  excited state population of keto-N7H averaged over all trajectories along with the fitting parameters.

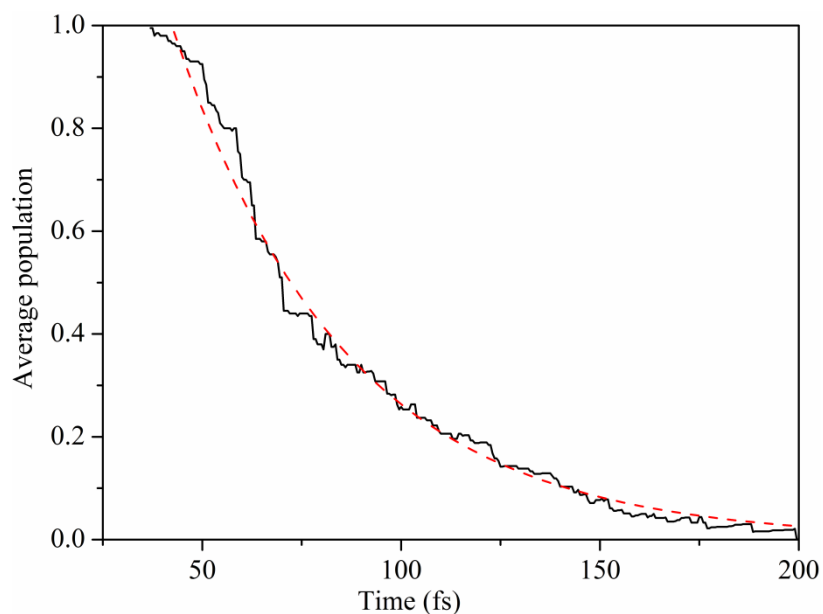

**Fig. S4.** Time evolution of the  $S_1$  excited state population of keto-N9H averaged over all trajectories along with the fitting parameters.

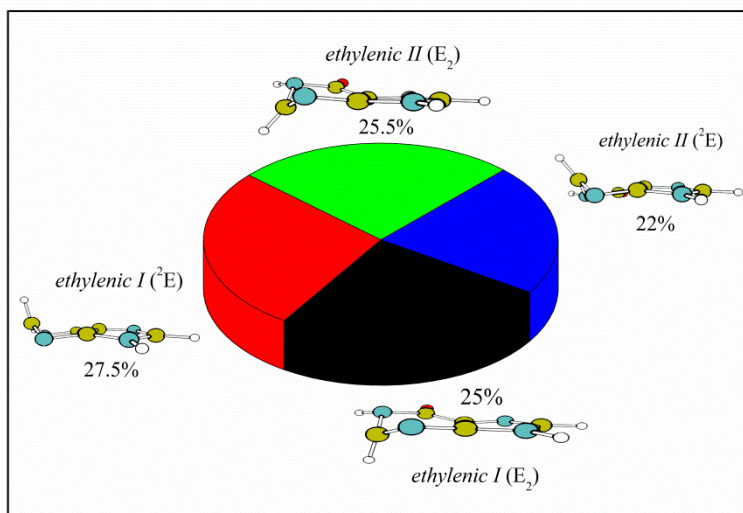

**Fig. S5.** Four of the main  $S_1/S_0$  conical intersections of keto-N9H. The percentages show how often each type of structure is accessed for decay in the current dynamics simulations.

**Table S1. Cartesian coordinates (Å) of the CCSD optimized ground-state geometry of keto-N7H.**

| Atom | X         | Y         | Z        |
|------|-----------|-----------|----------|
| C    | -0.004666 | 0.549382  | 0.000000 |
| C    | -0.947387 | -0.466811 | 0.000000 |
| C    | 0.645807  | -2.038175 | 0.000000 |
| C    | 1.415917  | 0.317474  | 0.000000 |
| C    | -2.038982 | 1.358718  | 0.000000 |
| N    | -0.630054 | -1.814154 | 0.000000 |
| N    | 1.634645  | -1.069538 | 0.000000 |
| N    | -0.721882 | 1.722166  | 0.000000 |
| N    | -2.222460 | 0.051135  | 0.000000 |
| O    | 2.328069  | 1.137030  | 0.000000 |
| H    | 1.010549  | -3.063972 | 0.000000 |
| H    | 2.609729  | -1.353884 | 0.000000 |
| H    | -2.834953 | 2.094398  | 0.000000 |
| H    | -0.333125 | 2.656644  | 0.000000 |

**Table S2. Cartesian coordinates (Å) of the CCSD optimized ground-state geometry of keto-N9H.**

| Atom | X         | Y         | Z        |
|------|-----------|-----------|----------|
| C    | -0.002247 | 0.617965  | 0.000000 |
| C    | -0.882882 | -0.452179 | 0.000000 |
| C    | 0.676229  | -2.019481 | 0.000000 |
| C    | 1.425199  | 0.362252  | 0.000000 |
| C    | -1.948463 | 1.475076  | 0.000000 |
| N    | -0.606011 | -1.798988 | 0.000000 |
| N    | 1.640893  | -1.045957 | 0.000000 |
| N    | -0.683279 | 1.823327  | 0.000000 |
| N    | -2.132325 | 0.108658  | 0.000000 |
| O    | 2.369982  | 1.132836  | 0.000000 |
| H    | 1.040253  | -3.045433 | 0.000000 |
| H    | 2.619874  | -1.317299 | 0.000000 |
| H    | -2.785622 | 2.163295  | 0.000000 |
| H    | -3.006895 | -0.400345 | 0.000000 |

**Table S3. Cartesian coordinates (Å) of the MR-CIS optimized ground-state geometry of keto-N7H.**

| Atom | X         | Y         | Z         |
|------|-----------|-----------|-----------|
| C    | -0.003447 | 0.545246  | -0.000000 |
| C    | -0.952488 | -0.473986 | -0.000000 |
| C    | 0.647476  | -2.024060 | 0.000000  |
| C    | 1.403831  | 0.314582  | -0.000000 |
| C    | -2.024603 | 1.355357  | 0.000000  |
| N    | -0.628087 | -1.801586 | -0.000000 |
| N    | 1.621784  | -1.060359 | -0.000000 |
| N    | -0.716319 | 1.710233  | 0.000000  |
| N    | -2.207655 | 0.048450  | -0.000000 |
| O    | 2.304093  | 1.109149  | -0.000000 |
| H    | 1.013938  | -3.034923 | -0.000000 |
| H    | 2.580724  | -1.343265 | 0.000000  |
| H    | -2.806784 | 2.087637  | 0.000000  |
| H    | -0.336352 | 2.633283  | 0.000000  |

**Table S4. Cartesian coordinates (Å) of the MR-CIS optimized ground-state geometry of keto-N9H.**

| Atom | X         | Y         | Z         |
|------|-----------|-----------|-----------|
| C    | 0.000815  | 0.617994  | -0.000000 |
| C    | -0.885057 | -0.456299 | -0.000000 |
| C    | 0.675876  | -2.006162 | 0.000000  |
| C    | 1.415800  | 0.358949  | 0.000000  |
| C    | -1.940262 | 1.464488  | -0.000000 |
| N    | -0.605684 | -1.784661 | -0.000000 |
| N    | 1.628420  | -1.039012 | 0.000000  |
| N    | -0.674420 | 1.806844  | -0.000000 |
| N    | -2.120607 | 0.108265  | 0.000000  |
| O    | 2.348878  | 1.102246  | 0.000000  |
| H    | 1.039813  | -3.017725 | 0.000000  |
| H    | 2.590442  | -1.311948 | -0.000000 |
| H    | -2.769742 | 2.142442  | -0.000000 |
| H    | -2.986707 | -0.387927 | 0.000000  |

**Table S5. Cartesian coordinates (Å) of the CASSCF optimized ground-state geometry of keto-N7H.**

| Atom | X         | Y         | Z         |
|------|-----------|-----------|-----------|
| C    | -0.009743 | 0.548567  | 0.000000  |
| C    | -0.942236 | -0.460104 | 0.000000  |
| C    | 0.641310  | -2.028437 | -0.000000 |
| C    | 1.409843  | 0.303328  | 0.000000  |
| C    | -2.027419 | 1.351557  | -0.000000 |
| N    | -0.617660 | -1.799191 | 0.000000  |
| N    | 1.628433  | -1.059620 | -0.000000 |
| N    | -0.718998 | 1.712831  | -0.000000 |
| N    | -2.203888 | 0.057623  | 0.000000  |
| O    | 2.296428  | 1.111436  | 0.000000  |
| H    | 1.002837  | -3.038678 | -0.000000 |
| H    | 2.584582  | -1.343387 | -0.000000 |
| H    | -2.813926 | 2.076299  | -0.000000 |
| H    | -0.342298 | 2.633068  | -0.000000 |

**Table S6. Cartesian coordinates (Å) of the CASSCF optimized ground-state geometry of keto-N9H.**

| Atom | X         | Y         | Z         |
|------|-----------|-----------|-----------|
| C    | -0.006316 | 0.609614  | 0.000000  |
| C    | -0.883649 | -0.445312 | -0.000000 |
| C    | 0.671663  | -2.006976 | 0.000000  |
| C    | 1.420178  | 0.346406  | -0.000000 |
| C    | -1.939070 | 1.464574  | 0.000000  |
| N    | -0.592442 | -1.782931 | -0.000000 |
| N    | 1.636795  | -1.035248 | 0.000000  |
| N    | -0.686058 | 1.804015  | 0.000000  |
| N    | -2.123732 | 0.108011  | -0.000000 |
| O    | 2.335382  | 1.111864  | -0.000000 |
| H    | 1.032520  | -3.017464 | 0.000000  |
| H    | 2.596064  | -1.308530 | 0.000000  |
| H    | -2.763528 | 2.145733  | 0.000000  |
| H    | -2.986692 | -0.385617 | -0.000000 |

**Table S7. Cartesian coordinates (Å) of the MR-CIS optimized structure of ethylenic I (<sup>2</sup>E) for keto-N7H.**

| Atom | X         | Y         | Z         |
|------|-----------|-----------|-----------|
| C    | -0.200769 | 0.442144  | -0.234843 |
| C    | -0.689973 | -0.867299 | -0.024357 |
| C    | 1.412880  | -1.449997 | -0.320903 |
| C    | 1.184871  | 0.827786  | 0.050052  |
| C    | -2.380205 | 0.402714  | -0.039315 |
| N    | 0.225165  | -1.814395 | 0.241992  |
| N    | 1.982428  | -0.305160 | 0.267812  |
| N    | -1.319138 | 1.233063  | -0.197954 |
| N    | -2.048346 | -0.867802 | 0.088550  |
| O    | 1.598288  | 1.946883  | 0.103792  |
| H    | 1.587814  | -1.647675 | -1.370462 |
| H    | 2.962459  | -0.132560 | 0.183892  |
| H    | -3.385211 | 0.775032  | -0.025886 |
| H    | -1.337738 | 2.228677  | -0.268772 |

**Table S8. Cartesian coordinates (Å) of the MR-CIS optimized structure of ethylenic I (<sup>2</sup>E) for keto-N9H.**

| Atom | X         | Y         | Z         |
|------|-----------|-----------|-----------|
| C    | 0.224537  | -0.508369 | -0.144790 |
| C    | 0.660451  | 0.833502  | -0.018843 |
| C    | -1.372554 | 1.420419  | -0.408245 |
| C    | -1.197426 | -0.828941 | 0.084368  |
| C    | 2.340122  | -0.575807 | 0.022236  |
| N    | -0.206139 | 1.827245  | 0.168794  |
| N    | -1.986672 | 0.353697  | 0.244207  |
| N    | 1.292417  | -1.357153 | -0.094979 |
| N    | 2.015054  | 0.758775  | 0.094393  |
| O    | -1.692085 | -1.906497 | 0.138295  |
| H    | -1.541061 | 1.587885  | -1.464294 |
| H    | -2.955422 | 0.175942  | 0.073653  |
| H    | 3.359161  | -0.904260 | 0.062822  |
| H    | 2.644996  | 1.524567  | 0.202113  |



**Table S9. Cartesian coordinates (Å) of the CASSCF optimized structure of ethylenic I (<sup>2</sup>E) for keto-N7H.**

| Atom | X         | Y         | Z         |
|------|-----------|-----------|-----------|
| C    | -0.209858 | 0.442656  | -0.211682 |
| C    | -0.697814 | -0.844564 | -0.023890 |
| C    | 1.419116  | -1.462853 | -0.317339 |
| C    | 1.185447  | 0.814956  | 0.065251  |
| C    | -2.386315 | 0.403372  | -0.051876 |
| N    | 0.260106  | -1.767336 | 0.268531  |
| N    | 2.005441  | -0.316288 | 0.238604  |
| N    | -1.330032 | 1.235418  | -0.196875 |
| N    | -2.050022 | -0.858344 | 0.074467  |
| O    | 1.601316  | 1.931359  | 0.135410  |
| H    | 1.575686  | -1.667370 | -1.369890 |
| H    | 2.978649  | -0.129806 | 0.116306  |
| H    | -3.394305 | 0.760887  | -0.065334 |
| H    | -1.352658 | 2.225108  | -0.290479 |

**Table S10. Cartesian coordinates (Å) of the CASSCF optimized structure of ethylenic I (<sup>2</sup>E) for keto-N9H.**

| Atom | X         | Y         | Z         |
|------|-----------|-----------|-----------|
| C    | -0.080532 | -0.035438 | -0.059300 |
| C    | 0.000764  | 0.212259  | 2.088892  |
| C    | 1.383088  | 0.299314  | 1.954163  |
| C    | 2.047361  | -0.301163 | 0.778753  |
| C    | 0.949063  | 0.724676  | 3.988011  |
| O    | 3.213346  | -0.430516 | 0.602944  |
| N    | 1.107494  | -0.733890 | -0.216468 |
| N    | -0.713091 | -0.316867 | 1.082171  |
| N    | 1.948877  | 0.609403  | 3.173317  |
| N    | -0.272603 | 0.476187  | 3.389954  |
| H    | 1.528117  | -0.793329 | -1.121015 |
| H    | -1.166235 | 0.486855  | 3.824222  |
| H    | 1.017942  | 0.996233  | 5.020080  |
| H    | -0.218375 | 0.918064  | -0.552869 |

**Table S11. Cartesian coordinates (Å) of the MR-CIS optimized structure of ethylenic I (E<sub>2</sub>) for keto-N7H.**

| Atom | X         | Y         | Z         |
|------|-----------|-----------|-----------|
| C    | -0.234070 | 0.422072  | 0.220979  |
| C    | -0.688217 | -0.906422 | 0.056240  |
| C    | 1.411266  | -1.427992 | 0.468689  |
| C    | 1.154576  | 0.823147  | -0.026195 |
| C    | -2.402144 | 0.326081  | -0.063290 |
| N    | 0.255949  | -1.845360 | -0.124199 |
| N    | 1.982798  | -0.301461 | -0.152371 |
| N    | -1.365140 | 1.185833  | 0.097631  |
| N    | -2.040303 | -0.941732 | -0.113080 |
| O    | 1.547548  | 1.946941  | -0.120229 |
| H    | 1.545442  | -1.570124 | 1.533119  |
| H    | 2.954964  | -0.103734 | -0.038130 |
| H    | -3.412760 | 0.675537  | -0.137083 |
| H    | -1.406073 | 2.183112  | 0.116537  |

**Table S12. Cartesian coordinates (Å) of the MR-CIS optimized structure of ethylenic I (E<sub>2</sub>) for keto-N9H.**

| Atom | X         | Y         | Z         |
|------|-----------|-----------|-----------|
| C    | 0.244971  | -0.511619 | 0.116976  |
| C    | 0.691706  | 0.829884  | 0.031592  |
| C    | -1.351432 | 1.420810  | 0.356525  |
| C    | -1.169084 | -0.820225 | -0.170207 |
| C    | 2.364920  | -0.587664 | 0.026966  |
| N    | -0.162585 | 1.831577  | -0.169708 |
| N    | -1.946191 | 0.369407  | -0.337406 |
| N    | 1.309847  | -1.365231 | 0.091218  |
| N    | 2.049181  | 0.749756  | -0.033150 |
| O    | -1.666583 | -1.893912 | -0.261933 |
| H    | -1.557996 | 1.570165  | 1.408523  |
| H    | -2.921421 | 0.193924  | -0.205900 |
| H    | 3.383167  | -0.920922 | 0.018025  |
| H    | 2.686401  | 1.513923  | -0.102921 |

**Table S13. Cartesian coordinates (Å) of the CASSCF optimized structure of ethylenic I (E<sub>2</sub>) for keto-N7H.**

| Atom | X         | Y         | Z         |
|------|-----------|-----------|-----------|
| C    | -0.242120 | 0.421298  | 0.199409  |
| C    | -0.696459 | -0.883847 | 0.055792  |
| C    | 1.418021  | -1.440800 | 0.465422  |
| C    | 1.155737  | 0.809395  | -0.040571 |
| C    | -2.408382 | 0.327263  | -0.051857 |
| N    | 0.290309  | -1.799255 | -0.150175 |
| N    | 2.004324  | -0.311278 | -0.124481 |
| N    | -1.375812 | 1.188088  | 0.096462  |
| N    | -2.042700 | -0.931554 | -0.099754 |
| O    | 1.552303  | 1.929597  | -0.149971 |
| H    | 1.535406  | -1.589246 | 1.532352  |
| H    | 2.967247  | -0.097459 | 0.030485  |
| H    | -3.422769 | 0.663151  | -0.099570 |
| H    | -1.421468 | 2.180568  | 0.136941  |

**Table S14. Cartesian coordinates (Å) of the CASSCF optimized structure of ethylenic I (E<sub>2</sub>) for keto-N9H.**

| Atom | X         | Y         | Z         |
|------|-----------|-----------|-----------|
| C    | 0.248887  | -0.496361 | 0.117563  |
| C    | 0.700764  | 0.817513  | 0.039947  |
| C    | -1.353886 | 1.424141  | 0.348401  |
| C    | -1.163701 | -0.807985 | -0.182985 |
| C    | 2.367313  | -0.593365 | 0.025190  |
| N    | -0.191593 | 1.793043  | -0.194465 |
| N    | -1.965278 | 0.375120  | -0.322386 |
| N    | 1.325193  | -1.358824 | 0.091211  |
| N    | 2.052773  | 0.752102  | -0.029024 |
| O    | -1.651951 | -1.883112 | -0.296760 |
| H    | -1.554452 | 1.585680  | 1.399858  |
| H    | -2.933280 | 0.185824  | -0.161675 |
| H    | 3.383270  | -0.927239 | 0.023400  |
| H    | 2.686984  | 1.514137  | -0.094996 |

**Table S15. Cartesian coordinates (Å) of the MR-CIS optimized structure of ethylenic II (<sup>2</sup>E) for keto-N7H.**

| Atom | X         | Y         | Z         |
|------|-----------|-----------|-----------|
| C    | -0.186986 | 0.409316  | -0.274589 |
| C    | -0.691929 | -0.905243 | -0.014904 |
| C    | 1.377387  | -1.386591 | -0.374287 |
| C    | 1.195510  | 0.817917  | 0.067865  |
| C    | -2.366180 | 0.393455  | -0.025283 |
| N    | 0.208279  | -1.839847 | 0.275019  |
| N    | 1.978683  | -0.317021 | 0.313109  |
| N    | -1.295725 | 1.210846  | -0.234642 |
| N    | -2.056342 | -0.871187 | 0.137382  |
| O    | 1.579621  | 1.944190  | 0.131002  |
| H    | 1.804101  | -1.887453 | -1.218747 |
| H    | 2.964379  | -0.162422 | 0.276346  |
| H    | -3.364535 | 0.784374  | -0.001743 |
| H    | -1.304859 | 2.206361  | -0.308638 |

**Table S16. Cartesian coordinates (Å) of the MR-CIS optimized structure of ethylenic II (<sup>2</sup>E) for keto-N9H.**

| Atom | X         | Y         | Z         |
|------|-----------|-----------|-----------|
| C    | 0.208953  | -0.480513 | -0.183867 |
| C    | 0.661112  | 0.872936  | -0.017029 |
| C    | -1.347724 | 1.361762  | -0.456201 |
| C    | -1.213532 | -0.813767 | 0.101287  |
| C    | 2.319339  | -0.569083 | 0.017936  |
| N    | -0.191922 | 1.856453  | 0.179703  |
| N    | -1.985270 | 0.369829  | 0.286949  |
| N    | 1.266248  | -1.338591 | -0.142772 |
| N    | 2.016037  | 0.765005  | 0.132517  |
| O    | -1.683696 | -1.900333 | 0.165516  |
| H    | -1.745830 | 1.813464  | -1.343073 |
| H    | -2.964160 | 0.209344  | 0.165062  |
| H    | 3.332802  | -0.915098 | 0.064100  |
| H    | 2.659589  | 1.514025  | 0.272114  |

**Table S17. Cartesian coordinates (Å) of the CASSCF optimized structure of ethylenic II (<sup>2</sup>E) for keto-N7H.**

| Atom | X         | Y         | Z         |
|------|-----------|-----------|-----------|
| C    | -0.186986 | 0.409059  | -0.288777 |
| C    | -0.687634 | -0.887333 | -0.021753 |
| C    | 1.372377  | -1.379207 | -0.368766 |
| C    | 1.186008  | 0.803636  | 0.094891  |
| C    | -2.363018 | 0.391996  | -0.017703 |
| N    | 0.234443  | -1.804511 | 0.283126  |
| N    | 1.998915  | -0.340846 | 0.311890  |
| N    | -1.304441 | 1.212970  | -0.246400 |
| N    | -2.048787 | -0.861393 | 0.145567  |
| O    | 1.587374  | 1.920200  | 0.185271  |
| H    | 1.778963  | -1.874916 | -1.226063 |
| H    | 2.976395  | -0.163988 | 0.207602  |
| H    | -3.365193 | 0.767704  | 0.003767  |
| H    | -1.326330 | 2.200340  | -0.356932 |

**Table S18. Cartesian coordinates (Å) of the CASSCF optimized structure of ethylenic II (<sup>2</sup>E) for keto-N9H.**

| Atom | X         | Y         | Z         |
|------|-----------|-----------|-----------|
| C    | 0.205658  | -0.464364 | -0.207950 |
| C    | 0.663740  | 0.870795  | -0.024921 |
| C    | -1.344009 | 1.352594  | -0.446624 |
| C    | -1.198049 | -0.803790 | 0.122652  |
| C    | 2.314227  | -0.577517 | 0.025361  |
| N    | -0.207323 | 1.835675  | 0.176956  |
| N    | -1.996321 | 0.383169  | 0.290054  |
| N    | 1.279180  | -1.331472 | -0.158658 |
| N    | 2.011564  | 0.769497  | 0.139689  |
| O    | -1.671022 | -1.886121 | 0.212030  |
| H    | -1.736031 | 1.795432  | -1.340174 |
| H    | -2.964989 | 0.202282  | 0.122531  |
| H    | 3.324921  | -0.923928 | 0.081155  |
| H    | 2.650617  | 1.512935  | 0.300031  |

**Table S19. Cartesian coordinates (Å) of the MR-CIS optimized structure of ethylenic II (E<sub>2</sub>) for keto-N7H.**

| Atom | X         | Y         | Z         |
|------|-----------|-----------|-----------|
| C    | -0.221054 | 0.391149  | 0.261857  |
| C    | -0.688514 | -0.945388 | 0.048211  |
| C    | 1.372561  | -1.363074 | 0.517658  |
| C    | 1.166513  | 0.812176  | -0.043072 |
| C    | -2.386838 | 0.315478  | -0.077247 |
| N    | 0.241483  | -1.873427 | -0.156155 |
| N    | 1.981617  | -0.316227 | -0.197289 |
| N    | -1.342595 | 1.165376  | 0.135011  |
| N    | -2.045552 | -0.948655 | -0.162523 |
| O    | 1.530696  | 1.941997  | -0.147471 |
| H    | 1.772522  | -1.811932 | 1.403444  |
| H    | 2.961653  | -0.138660 | -0.127756 |
| H    | -3.390751 | 0.682920  | -0.162284 |
| H    | -1.374421 | 2.162908  | 0.157928  |

**Table S20. Cartesian coordinates (Å) of the MR-CIS optimized structure of ethylenic II (E<sub>2</sub>) for keto-N9H.**

| Atom | X         | Y         | Z         |
|------|-----------|-----------|-----------|
| C    | 0.228012  | -0.484282 | 0.155963  |
| C    | 0.692835  | 0.869331  | 0.030384  |
| C    | -1.328414 | 1.361656  | 0.403741  |
| C    | -1.184581 | -0.804312 | -0.187544 |
| C    | 2.343956  | -0.581238 | 0.030808  |
| N    | -0.147378 | 1.861030  | -0.179994 |
| N    | -1.942958 | 0.386772  | -0.380224 |
| N    | 1.281779  | -1.347489 | 0.138559  |
| N    | 2.051812  | 0.756380  | -0.070898 |
| O    | -1.657486 | -1.886871 | -0.288698 |
| H    | -1.756851 | 1.799748  | 1.283276  |
| H    | -2.926489 | 0.229713  | -0.297548 |
| H    | 3.356684  | -0.932130 | 0.015942  |
| H    | 2.703858  | 1.504107  | -0.172965 |

**Table S21. Cartesian coordinates (Å) of the CASSCF optimized structure of ethylenic II (E<sub>2</sub>) for keto-N7H.**

| Atom | X         | Y         | Z         |
|------|-----------|-----------|-----------|
| C    | -0.221598 | 0.391669  | 0.275579  |
| C    | -0.684978 | -0.926931 | 0.054350  |
| C    | 1.367634  | -1.356221 | 0.511240  |
| C    | 1.158625  | 0.796284  | -0.069995 |
| C    | -2.383357 | 0.313944  | -0.084236 |
| N    | 0.267155  | -1.837928 | -0.165231 |
| N    | 2.002254  | -0.339642 | -0.194388 |
| N    | -1.351717 | 1.168060  | 0.146121  |
| N    | -2.037995 | -0.938950 | -0.170371 |
| O    | 1.541474  | 1.915413  | -0.200252 |
| H    | 1.746908  | -1.799802 | 1.408669  |
| H    | 2.970811  | -0.136744 | -0.058949 |
| H    | -3.390872 | 0.666285  | -0.166311 |
| H    | -1.397535 | 2.159027  | 0.205154  |

**Table S22. Cartesian coordinates (Å) of the CASSCF optimized structure of ethylenic II (E<sub>2</sub>) for keto-N9H.**

| Atom | X         | Y         | Z         |
|------|-----------|-----------|-----------|
| C    | 0.223762  | -0.468682 | 0.179772  |
| C    | 0.695038  | 0.866897  | 0.038362  |
| C    | -1.324413 | 1.352585  | 0.394190  |
| C    | -1.168532 | -0.794027 | -0.208341 |
| C    | 2.338929  | -0.589598 | 0.023119  |
| N    | -0.163051 | 1.840247  | -0.178174 |
| N    | -1.953985 | 0.400297  | -0.383498 |
| N    | 1.293952  | -1.340860 | 0.154756  |
| N    | 2.047534  | 0.760938  | -0.077904 |
| O    | -1.643352 | -1.871863 | -0.334725 |
| H    | -1.746976 | 1.781555  | 1.280562  |
| H    | -2.929138 | 0.222098  | -0.255358 |
| H    | 3.349241  | -0.940709 | -0.001305 |
| H    | 2.695885  | 1.503512  | -0.200503 |
